# Supplementary material for: Interactome analysis of gene expression profiles identifies CDC6 as a potential therapeutic target modified by miR-215-5p in hepatocellular carcinoma
Source: PubMed Central journal article supplement (PMC7646103; doi:10.7150/ijms.51145), 2020-10-18
Supplement: ijmsv17p2926s1.pdf [file ijmsv17p2926s1.pdf]

## SUPPLEMENTARY MATERIALS

### Supplementary Figures

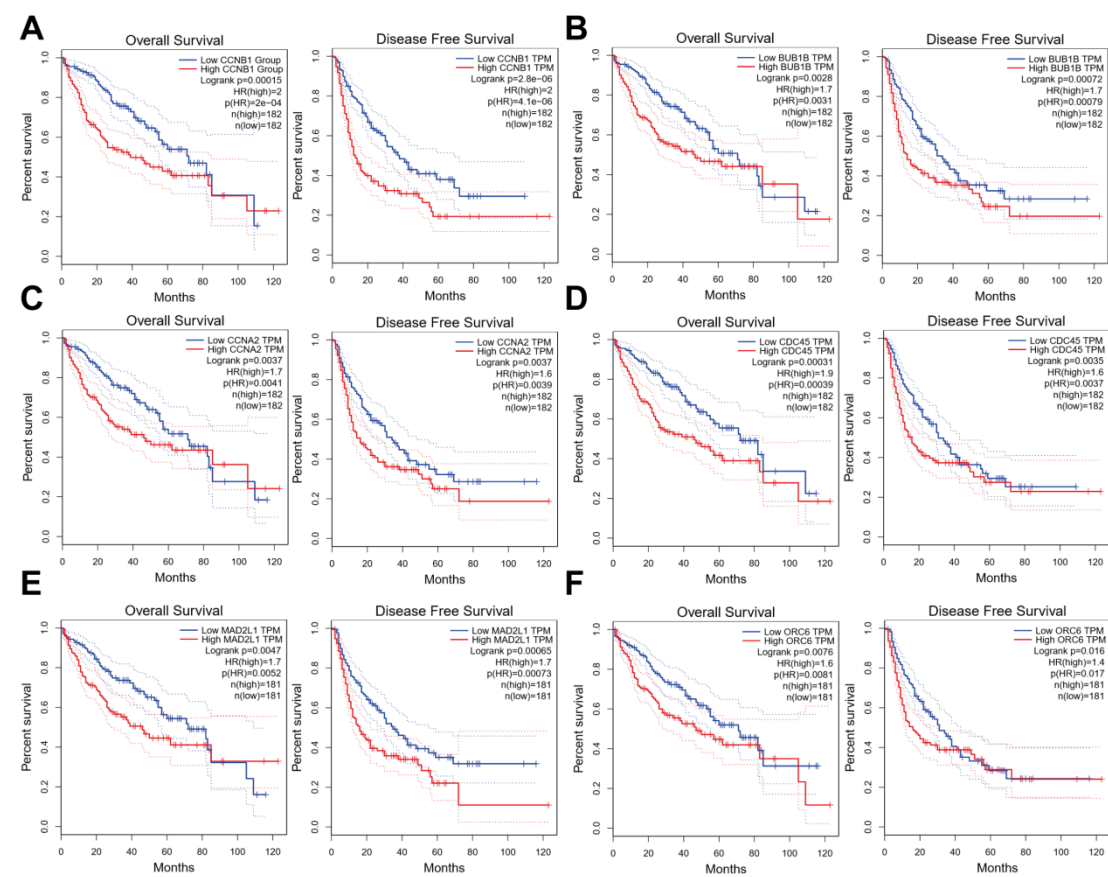

**Supplementary Figure 1.** Survival analysis based on key genes. (A-F) Survival analysis of the association between CCNB1 (A), BUB1B (B), CCNA2 (C), CDC45 (D), MAD2L1 (E) and ORC6 (F) expression and overall survival or disease-free survival based on hepatocellular carcinoma patients in the TCGA cohort.

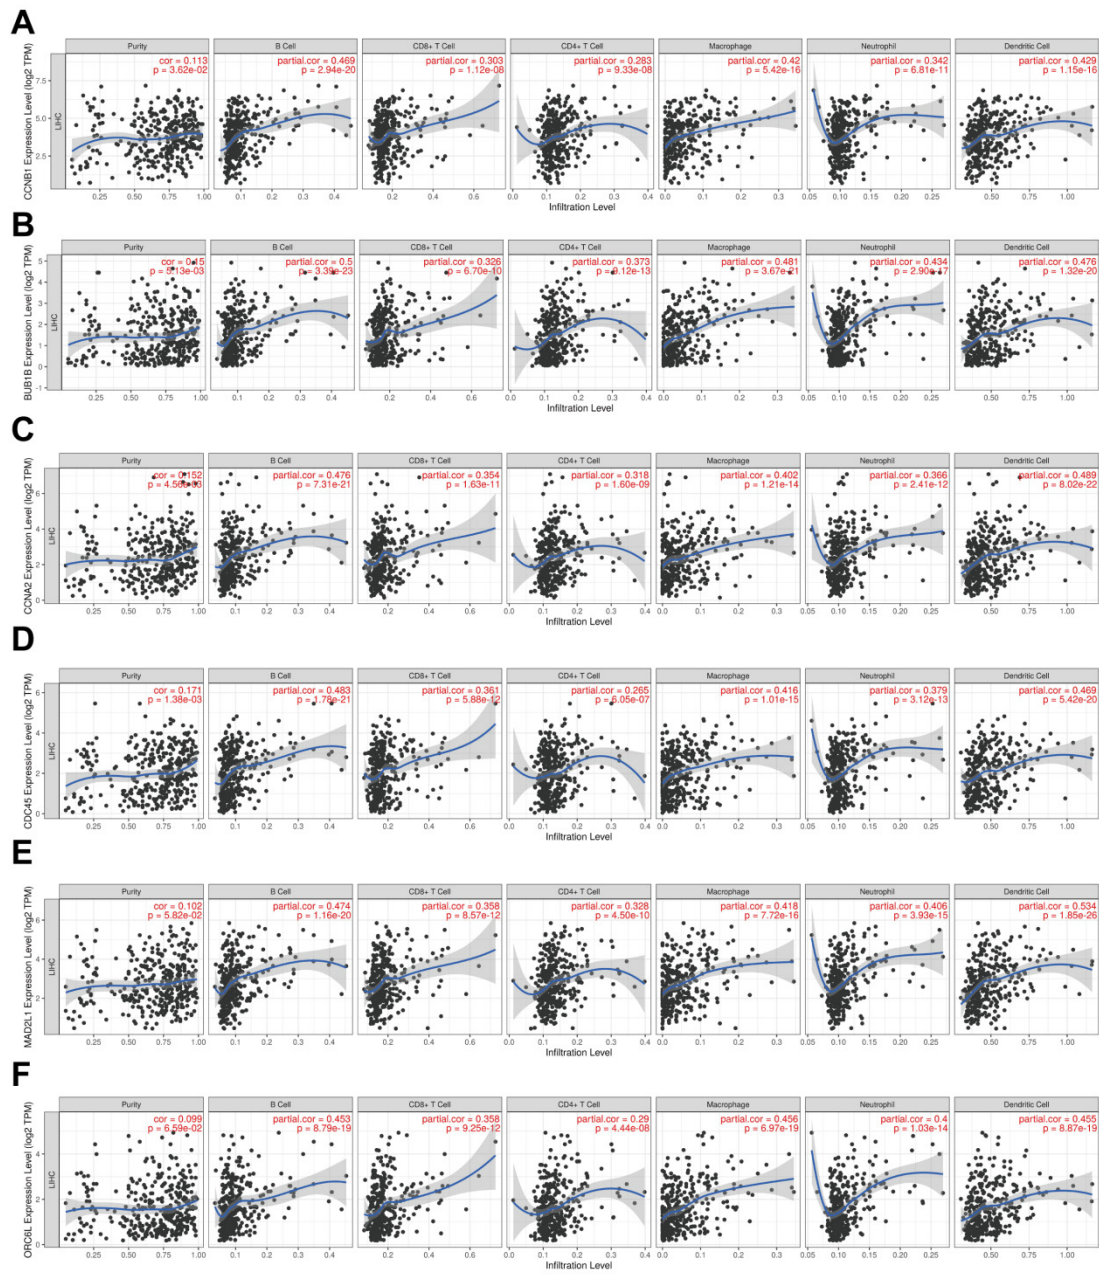

**Supplementary Figure 2. (A–F)** Correlation between levels of CCNB1 (A), BUB1B (B), CCNA2 (C), CDC45 (D), MAD2L1 (E) and ORC6 (F) and tumor purity, infiltrating levels of CD8+ T cells, CD4+ T cells, macrophages, neutrophils and dendritic cells in hepatocellular carcinoma tissues. Each dot represents a sample in the TCGA cohort.

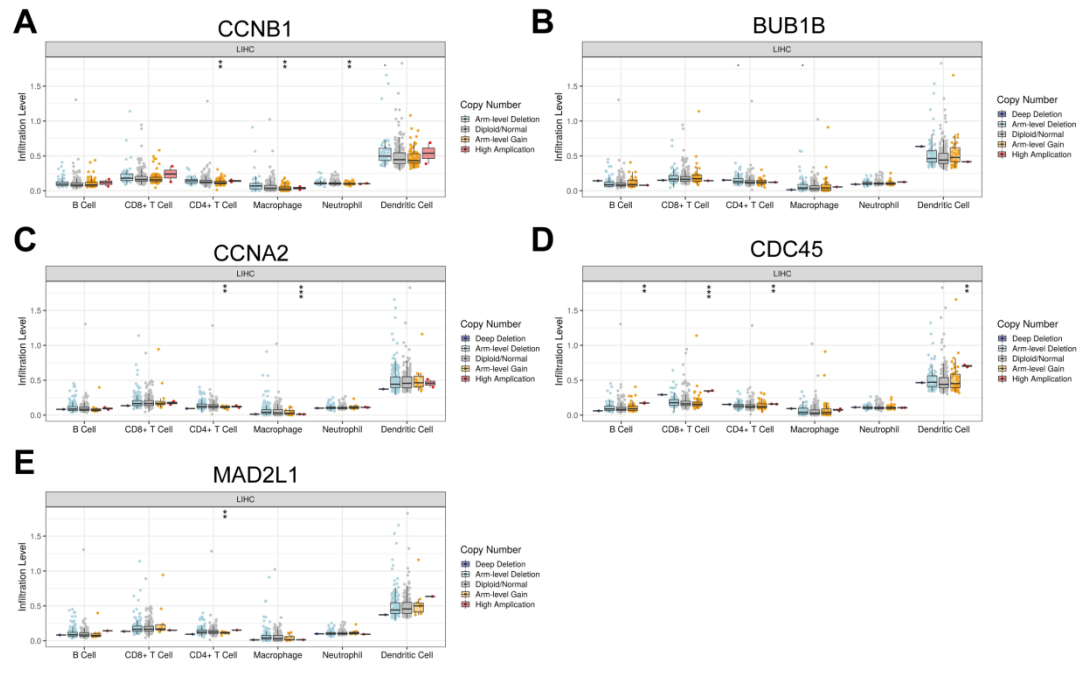

**Supplementary Figure 3. (A–E)** Correlation between copy number variation of key genes and immune cell infiltration. Correlation between CCNB1 (A), BUB1B (B), CCNA2 (C), CDC45 (D) and MAD2L1 (E) copy number variation affected infiltrating levels in hepatocellular carcinoma tissues.
